# Supplementary material
Source: Elsevier journal article supplement (https://www.sciencedirect.com/science/article/pii/S2603647918300125)
Supplement: mmc1 [file S2603647918300125:mmc1.doc]

Anexo: Recomendaciones Choosing Wisely proporcionadas por sociedades científicas de España, Canadá y Estados Unidos.

Top 5 Sociedad Española de Medicina Interna.

| No está indicado el cribado ni el tratamiento de la bacteriuria asintomática, incluyendo pacientes con sondaje vesical, salvo en el embarazo o en procedimientos quirúrgicos urológicos |  |
| --- | --- |
| No usar ácido acetil-salicílico como prevención primaria en personas sin enfermedad cardiovascular |  |
| No usar benzodiacepinas para el tratamiento del insomnio, la agitación o el delirio en personas de edad avanzada |  |
| No está indicada la determinación de los péptidos natriuréticos para la toma de decisiones terapéuticas en la insuficiencia cardiaca |  |
| En la mayoría de las ocasiones que se detecta una cifra de presión arterial elevada no existe indicación para iniciar el tratamiento antihipertensivo de manera inmediata |  |

**Top 5 Sociedad Española de Medicina de Familia y Comunitaria**

| **No solicitar densitometría de forma rutinaria en mujeres postmenopáusicas para valorar el riesgo de fractura osteoporótica, sin realizar antes una valoración de factores de riesgo.** |  |
| --- | --- |
| No utilizar la terapia hormonal (estrógenos o estrógenos con progestágenos) con el objetivo de prevenir la enfermedad vascular en mujeres posmenopáusicas. |  |
| **No usar tiras reactivas y glucómetros en pacientes diabéticos tipo 2 en tratamiento con fármacos orales no hipoglucemiantes, salvo situaciones de control glucémico inestable.** |  |
| **No realizar de forma sistemática la determinación de PSA a individuos asintomáticos sin antecedentes familiares de primer grado de cáncer de próstata.** |  |
| No emplear la rifampicina junto con pirazinamida por su elevada toxicidad para la quimioprofilaxis primaria de la tuberculosis en las personas inmunocompetentes. |  |

**Abreviaturas:**

**PSA: antígeno prostático específico (Prostate specific antigen)**

Top 5 Canadian Cardiovascular Society

| No realizar estudio de imagen de estrés cardiaco o estudios de imagen avanzados en la evaluación inicial de pacientes sin síntomas cardiacos a no ser que existan marcadores de alto riesgo |  |
| --- | --- |
| No realizar estudio de imagen de estrés cardiaco o estudios de imagen avanzados como parte de la rutina de seguimiento en pacientes asintomáticos |  |
| No realizar estudio de imagen de estrés cardiaco o estudios de imagen avanzados como evaluación preoperatoria en pacientes que van a ser sometidos a cirugía no cardiaca de bajo riesgo |  |
| No realizar ecocardiografia rutinaria como parte del seguimiento en pacientes con enfermedad valvular nativa asintomática sin que el paciente presente cambios en signos o síntomas |  |
| No realizar electrocardiogramas anuales en pacientes de bajo riesgo asintomáticos |  |

Top 5 Sociedad Española de Cardiología

| **No usar como primera línea de tratamiento clopidogrel en monoterapia tras un infarto de miocardio** |  |
| --- | --- |
| No prescribir fibratos de forma rutinaria para la prevención primaria de enfermedad cardiovascular |  |
| No utilizar de forma rutinaria antagonistas de canales de calcio para reducir el riesgo cardiovascular después de un infarto de miocardio |  |
| No usar en pacientes con disfunción sistólica ventricular izquierda, por sus efectos adversos (empeoramiento de la insuficiencia cardiaca, proarritmia, muerte) agentes antiarrítmicos (con especial énfasis en los del grupo I-C). |  |
| En pacientes con fibrilación auricular persistente en los cuales se ha corregido la causa de la misma (ej. infección pulmonar o fiebre) y se ha llevado a cabo con éxito cardioversión, no se recomienda el uso de antiarrítmicos para mantener el ritmo sinusal, a no ser que haya factores de riesgo para la recurrencia. |  |

Top 5 American Thoracic Society

| No realizar vigilancia con TAC pulmonar en los nódulos pulmonares indeterminados a intervalos más frecuentes de los recomendados o por un seguimiento superior al recomendado (2 años) |  |
| --- | --- |
| No administrar fármacos para hipertensión pulmonar en pacientes con hipertensión pulmonar secundaria a insuficiencia cardiaca izquierda o enfermedades pulmonares hipoxémicas (grupos 2 y 3 de hipertensión pulmonar) |  |
| No renovar la prescripción de oxigenoterapia domiciliaria para pacientes tras una hospitalización por una enfermedad aguda, a no ser que sean evaluados a los 2-3 meses del alta |  |
| No realizar Angio-TAC como diagnóstico de TEP en pacientes con baja probabilidad (Escala de Wells) y dímero D negativo de alta sensibilidad |  |
| No realizar screening de cáncer de pulmón con TAC en personas de bajo riesgo |  |

Top 5 **Sociedad Española de Neumología y Cirugía Torácica**

| En pacientes EPOC, con presión parcial de oxígeno en sangre arterial (PaO2) mayor de 55 mmHg y sin desaturación por ejercicio, no prescribir tratamiento ambulatorio con oxígeno. |  |
| --- | --- |
| En el asma bronquial, no utilizar LABAs (broncodilatadores betamiméticos inhalados de acción prolongada) como único tratamiento |  |
| No se debe realizar de forma rutinaria resonancia magnética para evaluar el estadio del tumor primario en el cáncer pulmonar de célula no pequeña. |  |
| No utilizar sistemáticamente antibióticos para el tratamiento de pacientes con agudizaciones de EPOC sin datos de gravedad y con un solo criterio de Antonhisen (que no sea la purulencia de esputo)* |  |
| En pacientes con dificultad para mantener el sueño no utilizar hipnóticos sin tener un diagnóstico etiológico previo. |  |

* Criterios de Anthonisen: aumento de la disnea, incremento de la producción de esputo, esputo purulento.

**Abreviaturas:**

**EPOC: Enfermedad pulmonar obstructiva crónica**

**LABA: Broncodilatadores betamiméticos inhalados de acción prolongada (Long- acting β agonists)**

**TAC: Tomografia axial computadorizada**

**TEP: Tromboembolismo pulmonary**

Top 5 Canadian Association of Gastroenterology

| No mantener tratamiento con inhibidor de la bomba de protones para los síntomas gastrointestinales sin intentar reducir o suspender el tratamiento al menos 1 vez al año en la mayoría de los pacientes (los pacientes con esófago de Barrett, esofagitis grado D de la clasificación de Los Angeles y la evidencia de una hemorragia gastrointestinal reciente son una excepción) |  |
| --- | --- |
| No utilizar estudios con contraste baritado en el diagnóstico de una dispepsia |  |
| No realizar gastroscopia en la investigación de dispepsia en personas menores de 55 años de edad sin signos de alarma (disfagia, anemia o pérdida de peso) |  |
| No realizar colonoscopia para estudio de estreñimiento en pacientes con edad inferior a 50 años sin historia familiar de cáncer de colon o signos de alarma (anemia o pérdida de peso) |  |
| No utilizar rutinariamente tratamiento prolongado con esteroides en la enfermedad inflamatoria intestinal. Los riesgos de un tratamiento esteroideo con duración de más de 4 meses o más de dos ciclos al año sobrepasan los beneficios. |  |

****Top 5 Sociedad Española de Patología Digestiva****

| No programar revisiones, ni colonoscopias antes de 5 años en el seguimiento postpolipectomía de pacientes con uno o dos adenomas menores de un centímetro, sin displasia de alto grado, completamente extirpados en una colonoscopia de alta calidad |  |
| --- | --- |
| No dar profilaxis antibiótica a personas con pancreatitis aguda leve |  |
| No prescribir IBP como gastroprotección en pacientes sin factores de riesgo de complicaciones gastrointestinales |  |
| No restringir la ingesta de líquidos en los pacientes con ascitis, salvo en presencia de hiponatremia dilucional con natremia inferior a 125 meq/l |  |
| No utilizar la detección de anticuerpos IgA, ni IgG anti-gliadina para el diagnóstico de la enfermedad celiaca. |  |

**Abreviaturas:**

**Ig: inmunoglobulina**

Top 5 Society of Hospital Medicine

| No está indicado colocar, o mantener los catéteres urinarios por incontinencia o por conveniencia o para monitorizar la diuresis en pacientes no críticos (indicaciones aceptables: enfermedad crítica, obstrucción, perioperatoriamente por menos de 2 días para procedimientos urológicos. Utilizar el peso del paciente para monitorizar la diuresis. |  |
| --- | --- |
| No prescribir profilaxis de la úlcera de estrés en pacientes médicos hospitalizados a no ser que exista alto riesgo de complicaciones gastrointestinales |  |
| Evitar las transfusiones de concentrado de hematíes en niveles arbitrarios de Hb o Hct y en ausencia de síntomas de enfermedad coronaria activa, fallo cardiaco o ACVA |  |
| No utilizar telemetría fuera de la UCI en pacientes de bajo riesgo con dolor torácico y ECG normal |  |
| No realizar determinaciones analíticas repetidas en los casos de estabilidad clínica y estabilidad de parámetros de laboratorio |  |

**Abreviaturas:**

**ACVA: accidente cerebrovascular agudo**

**Hb: hemoglobina**

**Hct: hematócrito**

**UCI: Unidad de cuidados intensivos**

**ECG: electrocardiograma**

Top 5 Canadian Society of Hospital Medicine

| No colocar o mantener una sonda urinaria sin re-evaluación. La sonda urinaria se asocia con riesgos tales como ITU, sepsis y delirio. Las guias clínicas aconsejan re-evaluar las indicaciones de mantener el catéter y minimizar la duración de uso |  |
| --- | --- |
| No prescribir antibióticos para bacteriuria asintomática en pacientes no embarazadas. |  |
| No utilizar benzodiacepinas u otros hipnóticos sedantes en pacientes ancianos como primera elección para el insomnio, la agitación o el delirio. Existe riesgo de caídas, delirio y fractura de cadera y mortalidad. Utilizar otras terapia alternativas |  |
| No solicitar rutinariamente estudios de neuroimagen (TAC, RMN o Doppler carotídeo) en la evaluación de un síncope en pacientes con examen neurológico normal |  |
| No solicitar rutinariamente TAC craneal en pacientes hospitalizados con delirio en ausencia de otros datos como antecedentes de traumatismo craneal, caída, nuevos signos focales neurológicos o disminución no explicada del nivel de conciencia |  |

**Abreviaturas:**

**ITU: Infección del tracto urinario**

**RMN: Resonancia magnética nuclear**

**TAC: Tomografia axial computadorizada**

Top 5 Infectious Diseases Society of America

| No tratar la bacteriuria asintomática con antibióticos |  |
| --- | --- |
| Evitar prescribir antibióticos en infecciones respiratorias altas (sinusitis, faringitis, bronquitis) |  |
| No utilizar antibióticos para tratamiento de la dermatitis de éstasis |  |
| No solicitar test de infección por *Clostridium difficile* (*C. difficile*) en ausencia de diarrea |  |
| No utilizar antibióticos para prevenir endocarditis infecciosa en el prolapso mitral |  |

Top 5 Canadian Medical Microbiology and Infectious Diseases

| No prescribir de forma rutinaria administración intravenosa de antimicrobianos con alta biodisponibilidad en pacientes que pueden tomar y absorber la medicación oral. Los antimicrobianos como fluoroquinolonas, cotrimoxazol, clinadmicina, linezolid, metronidazol y fluconazol tienen una excelente biodisponibilidad y raramente precisan la via intravenosa. |  |
| --- | --- |
| No prescribir antimicrobianos alternativos de segunda línea en pacientes que refieren reacciones adversas no graves a penicilina cuando lo recomendado son beta-lactámicos como primera línea de tratamiento. |  |
| No repetir rutinariamente recuento de linfocitos CD4 en pacientes con infección por VIH que presentan carga viral no detectable durante más de 2 años y recuento linfocitario CD4 mayor a 500 células/µL, a no ser que se demuestre fallo virológico o aparezca evento oportunista. |  |
| No repetir de forma rutinaria pruebas de imagen en pacientes con osteomielitis en quienes existe mejoría clínica durante un tratamiento antimicrobiano adecuado. |  |
| No prescribir aminoglucósidos como tratamiento antimicrobiano sinérgico en pacientes con bacteriemia o endocarditis de válvula nativa causada por *Staphylococcus aureus* (*S. aureus*) |  |

Top 5 Society of Healthcare Epidemiology of America

| No continuar tratamiento antibiótico más allá de 72 horas en pacientes hospitalizados a no ser que el paciente tenga signos claros de infección |  |
| --- | --- |
| Evitar dispositivos invasivos (incluyendo catéteres centrales, tubos endotraqueales y catéteres urinarios) y si se requieren no utilizarlos más del tiempo necesario |  |
| No realizar perfil de orina, urocultivo, hemocultivo o test para *C. difficile* a no ser que el paciente tenga signos o síntomas de infección |  |
| No utilizar antibióticos en pacientes con una infección reciente por *C. difficile* sin evidencia convicente de su necesidad, ya que se incrementa el riesgo de recurrencia |  |
| No utilizar profilaxis antibiótica después que el paciente ha abandonado el quirófano |  |

**Top 5 Canadian Society of Nephrology**

| No iniciar tratamiento con agentes estimulantes de eritropoyetina en pacientes con insuficiencia renal crónica y valores de Hb iguales o superiores a 10 g/dL sin síntomas de anemia |  |
| --- | --- |
| No prescribir antiinflamatorios no esteroideos en pacientes con hipertensión o fallo cardiaco o insuficiencia renal crónica de cualquier causa, incluida diabetes |  |
| No prescribir inhibidores del enzima convertidor de angiotensina en combinación con bloqueadores de los receptores de angiotensina II en el tratamiento de la hipertensión, nefropatía diabética o fallo cardiaco |  |
| No iniciar tratamiento renal sustitutorio con diálisis sin haber consensuado previamente el tratamiento con el paciente, sus familiares y el equipo de nefrologia |  |
| No iniciar diálisis ambulatoria en pacientes con insuficiencia renal crónica estadio 5 en ausencia de indicaciones clínicas (uremia, sobrecarga de volumen, acidosis) |  |

**Abreviaturas:**

**Hb: Hemoglobina**

**Top 5** Sociedad Española de Nefrología

| No iniciar tratamiento sustitutivo renal con diálisis sin haber hecho previamente una adecuada toma de decisiones en la que participen el paciente, la familia y el médico. |  |
| --- | --- |
| En el paciente anciano con enfermedad renal crónica (ERC) y proteinuria, no se deberá procurar un objetivo de presión arterial inferior a 130/80 de forma rutinaria |  |
| No se deberá usar de forma rutinaria la asociación de un inhibidor directo de la renina y un IECA o ARAII. |  |
| No prescribir suplementos de ácido fólico, ni vitamina C específicamente para el tratamiento de la anemia en la ERC. |  |
| No medir sistemáticamente los niveles de renina plasmática como marcador pronóstico de hipertensión arterial en niños y niñas con daño renal permanente |  |

**Abreviaturas:**

**ARAII: antagonista de los receptores de angiotensina II**

**ERC: Enfermedad renal crónica**

**IECA: inhibidor del enzima convertidor de la angiotensina**

**Top 5**  Canadian Society of Palliative Care Physicians

| No retrase el tratamiento paliativo en un paciente con una enfermedad grave que presenta estrés físico, psicológico, social o espiritual debido a que espera tratamiento específico de su enfermedad |  |
| --- | --- |
| No retrase la planificación de cuidados para fases avanzadas |  |
| No utilice oxigenoterapia para tratamiento de disnea no hipóxica |  |
| No utilizar laxantes tipo docusato sódico (Dulcolaxo) para prevenir el estreñimiento causado por opiáceos. Comparado con placebo, el docusato sódico no mostró beneficios |  |
| No transfundir concentrado de hematíes en ausencia de síntomas en pacientes con límites arbitrarios de Hb o Hct. o si no se percibió beneficio en transfusiones previas |  |

Abreviaturas:

Hb: Hemoglobina

Hct: hematócrito

TOP 5 Canadian Society for **Transfusion** Medicine

| No transfundir sangre si hay otros tratamientos alternativos disponibles, por ejemplo, pacientes con déficit de hierro, hemodinámicamente estables, debería recibir tratamiento con hierro. |  |
| --- | --- |
| No transfundir más de 1 unidad de células rojas a la vez cuando se requiere transfusión en pacientes estables y sin sangrado. |  |
| No transfundir rutinariamente plaquetas a pacientes con trombopenia inducida por quimioterapia si la cifra de plaquetas es >10.000/µL, en ausencia de sangrado. Considerar dicha transfusión en función de la causa de la trombopenia, comorbilidad, síntomas de sangrado, factores de riesgo de sangrado o si precisa la realización de procedimientos invasivos. |  |
| No utilizar rutinariamente transfusiones de PFC o Complejo Protrombínico para revertir agentes anti-vitamina K en situaciones no urgentes, que pueden ser tratados con vitamina K o suspendiendo agentes anti-vitamina K. |  |
| No realizar reserva de sangre de forma rutinaria en el preoperatorio de determinadas intervenciones quirúrgicas (apendicectomía, colecistectomía, histerectomía y reparación de hernias). |  |

**Abreviaturas**

**PFC: plasma fresco congelado**

TOP 5 Canadian Society of Endocrinology and Metabolism

| No realizar autocontroles rutinarios en adultos con DM tipo 2 estable o tratados con fármacos no hipoglucemiante. Excepciones: enfermedad aguda, inicio de nuevos fármacos, peso significativamente fluctuante, HbA1c fuera de objetivo y pacientes que precisan monitorización para mantener objetivos. |  |
| --- | --- |
| No realizar test de función tiroidea en pacientes asintomáticos. |  |
| No realizar ecografía tiroidea de rutina en pacientes con test de función tiroidea alterados, a menos que existan anomalías en la palpación de la glándula tiroides. |  |
| No usar T3L o T4L como cribado de hipotiroidismo primario ni para monitorizar la respuesta al tratamiento con L-Tiroxina. |  |
| No solicitar rutinariamente Ac anti-TPO ya que pueden ser positivos en la población normal. En el contexto de enfermedad tiroidea indican una patogenia autoinmune y no se usan para influir en las modificaciones del tratamiento. |  |

**Abreviaturas:**

**Ac Anti-TPO: Anticuerpos antiperoxidasa tiroidea**

**HbA1c: Hemoglobina glicosilada**

**T3L: Triyodotironina libre**

**T4L: Tiroxina libre**

Top 10 American Geriatrics Society

| No se recomiendan sondas percutáneas de alimentación en pacientes con demencia avanzada. Ofrecer alimentación oral asistida. |  |
| --- | --- |
| No usar antipsicóticos como primera elección para tratar los síntomas conductuales y psicológicos de la demencia; usarlos cuando fallan las medidas no farmacológicas o cuando los pacientes representan una amenaza inminente para sí mismos o para otros. |  |
| Evitar el uso de medicamentos distintos a metformina para lograr una HbA1c < 7.5% en la mayoría de los ancianos; un control moderado generalmente es mejor. |  |
| No usar benzodiacepinas u otros hipnóticos sedantes en ancianos como primera elección para el insomnio, agitación o delirio. |  |
| No usar antimicrobianos para tratar la bacteriuria en ancianos a menos que presenten síntomas específicos del tracto urinario, |  |
| No prescribir inhibidores de la colinesterasa para la demencia sin realizar una evaluación periódica de los beneficios cognitivos percibidos y los efectos gastrointestinales. |  |
| No se recomienda el cribado de los cánceres de mama, colorrectal, próstata o pulmón, sin tener en cuenta la esperanza de vida y los riesgos de las pruebas, sobrediagnóstico y sobretratamiento. |  |
| Evitar la prescripción de estimulantes del apetito o suplementos hipercalóricos para el tratamiento de la anorexia en ancianos. Instar a optimizar el soporte social, discontinuar medicaciones que puedan interferir con la ingesta, proporcionar alimentación asistida y clarificar las metas y expectativas de los pacientes. |  |
| No prescribir una medicación sin llevar antes a cabo una revisión del régimen de medicamentos. |  |
| No usar medidas de contención física para manejar los trastornos del comportamiento en ancianos con delirio. |  |

**Abreviaturas:**

**HbA1c: hemoglobina glicosilada**
